# Supplementary material for: Rational Design of Berberine-Based FtsZ Inhibitors with Broad-Spectrum Antibacterial Activity
Source: PubMed Central journal article supplement (PMC4019636; doi:10.1371/journal.pone.0097514), 2014-05-13
Supplement: pone.0097514.s004.pdf [file pone.0097514.s004.pdf]

## Text S1 of Supporting Information

### Rational Design of Berberine-Based FtsZ Inhibitors with Broad-Spectrum Antibacterial Activity

Ning Sun<sup>1</sup>, Fung-Yi Chan<sup>1,3</sup>, Yu-Jing Lu<sup>1,2</sup>, Marco A. C. Neves<sup>3</sup>, Hok-Kiu Lui<sup>1</sup>, Yong Wang<sup>1</sup>, Ka-Yan Chow<sup>1</sup>, Kin-Fai Chan<sup>1</sup>, Siu-Cheong Yan<sup>1</sup>, Yun-Chung Leung<sup>1</sup>, Ruben Abagyan<sup>3,4</sup>, Tak-Hang Chan<sup>1</sup>, Kwok-Yin Wong<sup>1\*</sup>

<sup>1</sup> Department of Applied Biology and Chemical Technology and the State Key Laboratory of Chirosciences, The Hong Kong Polytechnic University, Hung Hom, Kowloon, Hong Kong, China.

<sup>2</sup> School of Chemical Engineering and Light Industry, Guangdong University of Technology, Guangzhou 510006, China.

<sup>3</sup> Skaggs School of Pharmacy & Pharmaceutical Sciences, University of California, San Diego, 9500 Gilman Drive, La Jolla, CA 92093, USA.

<sup>4</sup> Molsoft L.L.C, 11199 Sorrento Valley Road, S209, San Diego, CA 92121, USA.

\* Address correspondence to: Professor Kwok-yin Wong, Department of Applied Biology and Chemical Technology and the State Key Laboratory of Chiosciences, The Hong Kong Polytechnic University, Hung Hom, Kowloon, Hong Kong, P. R. China. Tel: (852) 3400 3977, Fax: (852) 2364 9932, Email: [kwok-yin.wong@polyu.edu.hk](mailto:kwok-yin.wong@polyu.edu.hk)

#### Contents:

Page S2-S4: Synthesis of berberine derivatives

Page S5-S12: ESI-Mass spectra of berberrubine and compounds **1-7**

Page S13-S20: <sup>1</sup>H NMR spectra of berberrubine and compounds **1-7**

Page S21: References

## Synthesis of berberine derivatives

The berberine derivatives were prepared according to previous protocols [1]. The synthetic pathway was shown in Scheme 1. Firstly, the  $\omega$ -bromoalkyl ether derivatives were synthesized from the commercially available phenol derivatives, which reacted with  $\alpha,\omega$ -dibromoalkanes in the presence of potassium carbonate in butanone to give a good yield [1]. Then, the selective demethylation of berberine at 190 °C under the vacuum gave a 68% yield of berberrubine [2]. Finally, the target compounds were obtained by reaction of berberrubine with different  $\omega$ -bromoalkyl ether derivatives in acetonitrile for 12-24 h respectively [1].

### Preparation of berberrubine

To remove the methyl group at the C9-position of berberine, 5 mmol berberine was heated at 190°C under vacuum for 30-50 min until the powder turned into dark brown. The powder was then purified by flash chromatography (CH<sub>2</sub>Cl<sub>2</sub> / MeOH = 10:1) to yield a carmine powder after solvent removal. Yield: 68%. <sup>1</sup>H NMR (400 MHz, DMSO-*d*<sub>6</sub>):  $\delta$  3.04 (t, *J* = 6.0 Hz, 2H), 3.73 (s, 3H), 4.8 (t, *J* = 6.0 Hz, 2H), 6.1 (s, 2H), 6.36 (d, *J* = 8.0 Hz, 1H), 6.96 (s, 1H), 7.16 (d, *J* = 7.6 Hz, 1H), 7.61 (s, 1H), 7.98 (s, 1H), 9.07 (s, 1H). ESI-MS *m/z*: 322.1 [M + H]<sup>+</sup>.

### Preparation of compounds 1-7

Berberubine (0.15 mmol) and 1,3-dibromopropane (0.5 mmol), for the synthesis of compound **7**, or a  $\omega$ -bromoalkyl ether derivative (0.5 mmol) for synthesis of **1-6** were mixed in 10 mL acetonitrile and stirred for 12 h at 90°C. After reaction, the crude product was obtained by removal of organic solvent under vacuum and then purified by flash chromatography (CH<sub>2</sub>Cl<sub>2</sub> / MeOH = 20:1) to yield a yellow powder. Yield: 40-55 %. <sup>1</sup>H NMR (400 MHz, DMSO-*d*<sub>6</sub>):

9-O-[3(Phenylol-1-yloxy)propyl]-berberine bromide (**1**):  $\delta$  3.35 (t, *J* = 6.4 Hz, 2H), 3.22 (t, *J* = 6.0 Hz, 2H), 4.01 (s, 3H), 4.27 (t, *J* = 6.4 Hz, 2H), 4.49 (t, *J* = 6.4 Hz, 2H), 4.87 (t, *J* = 6.0 Hz, 2H), 6.18 (s, 1H), 6.93-6.99 (m, 3H), 7.10 (s, 1H), 7.31 (t, *J* = 7.6 Hz, 2H), 7.80 (s, 1H), 8.05 (d, *J* = 8.8 Hz, 1H), 8.20 (d, *J* = 9.2 Hz, 1H), 8.94 (s, 1H), 9.78 (s, 1H); ESI-MS *m/z*: 456.2 [M - Br]<sup>+</sup>

9-O-[3-(4-Chloro-phenoxy)propyl]-berberine bromide (**2**):  $\delta$  2.31-2.37 (m, 2H), 3.2 (t, *J* = 6.4 Hz, 2H), 4.01 (s, 3H), 4.26 (t, *J* = 6.4 Hz, 2H), 4.70 (t, *J* = 6.4 Hz, 2H), 4.90 (t, *J* = 6.4 Hz, 2H), 6.18 (s, 2H), 7.01 (d, *J* = 6.0 Hz, 1H), 7.10 (s, 1H), 7.35 (d, *J* = 6.0 Hz, 1H), 7.81 (s, 1H), 7.99 (d, *J* = 5.2 Hz, 1H), 8.19 (d, *J* = 5.2 Hz, 1H), 8.94 (s, 1H), 9.79 (s, 1H); ESI-MS *m/z*: 490.1 [M - Br]<sup>+</sup>

9-O-[3-(4-Methoxy-phenoxy)propyl]-berberine bromide (**3**):  $\delta$  2.29 (t,  $J = 6.4$  Hz, 2H), 3.17 (t,  $J = 6.0$  Hz, 2H), 3.67 (s, 3H), 4.00 (s, 3H), 4.17 (t,  $J = 6.4$  Hz, 2H), 4.45 (t,  $J = 6.4$  Hz, 2H), 4.85 (t,  $J = 6.0$  Hz, 2H), 6.16 (s, 2H), 6.83-6.89 (m, 4H), 7.07 (s, 1H), 7.78 (s, 1H), 7.97 (d,  $J = 8.8$  Hz, 1H), 8.17 (t,  $J = 8.8$  Hz, 1H), 8.91 (s, 1H), 9.75 (s, 1H); ESI-MS  $m/z$ : 486.2 [M - Br]<sup>+</sup>

9-O-[3-(2-Methyl-phenoxy)propyl]-berberine bromide (**4**):  $\delta$  2.14 (s, 3H), 2.36 (m, 2H), 3.18 (t,  $J = 6.0$  Hz, 2H), 3.99 (s, 3H), 4.27 (t,  $J = 6.0$  Hz, 2H), 4.52 (t,  $J = 6.4$  Hz, 2H), 4.86 (t,  $J = 6.4$  Hz, 2H), 6.18 (s, 2H), 6.85 (t,  $J = 8.0$  Hz, 1H), 7.00 (d,  $J = 8.0$  Hz, 1H), 7.09 (s, 1H), 7.13-7.19 (m, 2H), 7.81 (s, 1H), 8.10 (d,  $J = 9.2$  Hz, 1H), 8.19 (d,  $J = 9.2$  Hz, 1H), 8.96 (s, 1H), 9.78 (s, 1H); ESI-MS  $m/z$ : 470.2 [M - Br]<sup>+</sup>

9-O-[3-(4-Nitro-phenoxy)propyl]-berberine bromide (**5**):  $\delta$  2.36-2.42 (m, 2H), 3.20 (t,  $J = 6.0$  Hz, 2H), 4.00 (s, 3H), 4.43 (t,  $J = 6.4$  Hz, 2H), 4.48 (t,  $J = 6.4$  Hz, 2H), 4.92 (t,  $J = 6.0$  Hz, 2H), 6.18 (s, 2H), 7.10 (s, 1H), 7.20 (d,  $J = 2.0$  Hz, 2H), 7.80 (s, 1H), 8.00 (d,  $J = 7.2$  Hz, 1H), 8.10 (d,  $J = 7.2$  Hz, 1H), 8.24 (d,  $J = 2.0$  Hz, 2H), 8.93 (s, 1H), 9.81 (s, 1H); ESI-MS  $m/z$ : 501.2 [M - Br]<sup>+</sup>

9-O-[4(Phenylol-1-yloxy)butyl]-berberine bromide (**6**):  $\delta$  2.01-2.09 (m, 4H), 3.20 (t,  $J = 6.4$  Hz, 2H), 4.05 (s, 3H), 4.09 (t,  $J = 6.0$  Hz, 2H), 3.37 (t,  $J = 6.0$  Hz, 2H), 4.94 (t,  $J = 6.4$  Hz, 2H), 6.18 (s, 2H), 6.91-6.95 (m, 3H), 7.10 (s, 1H), 7.29 (t,  $J = 7.2$  Hz, 2H), 7.81 (s, 1H), 7.99 (d,  $J = 9.2$  Hz, 1H), 8.21 (d,  $J = 9.2$  Hz, 1H), 8.94 (s, 1H), 9.78 (s, 1H); ESI-MS  $m/z$ : 470.2 [M - Br]<sup>+</sup>

9-O-(3-Bromopropoxy)-berberine bromide (**7**):  $\delta$  2.40-2.46 (m, 2H), 3.22 (t,  $J = 6.0$  Hz, 2H), 3.83 (t,  $J = 6.4$  Hz, 2H), 4.08 (s, 3H), 4.21 (t,  $J = 6.4$  Hz, 2H), 4.95 (t,  $J = 6.0$  Hz, 2H), 6.19 (s, 2H), 7.10 (s, 1H), 7.81 (s, 1H), 8.10 (d,  $J = 9.2$  Hz, 1H), 8.21 (d,  $J = 9.2$  Hz, 1H), 8.95 (s, 1H), 9.81 (s, 1H); ESI-MS  $m/z$ : 442.1 [M - Br]<sup>+</sup>

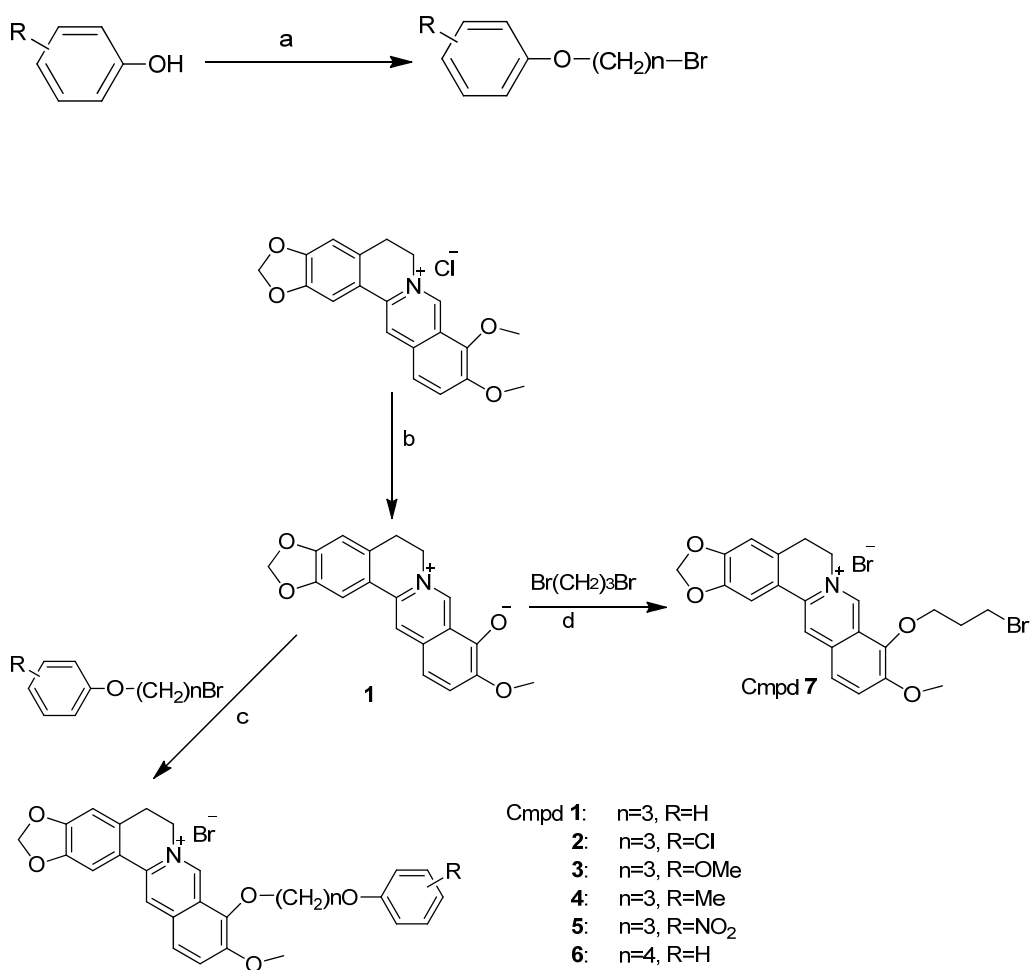

**Scheme 1** Synthetic routes of berberine derivatives.

Reagents and conditions: (a)  $\text{Br(CH}_2\text{)}_n\text{Br}$  ( $n=3$  or  $4$ ),  $\text{K}_2\text{CO}_3$ , Butanone,  $70\text{ }^\circ\text{C}$ , 2 h; (b)  $190\text{ }^\circ\text{C}$ , under vacuum, 30 min; (c) (d)  $\text{CH}_3\text{CN}$ ,  $80\text{ }^\circ\text{C}$ .

## Mass spectra of compounds

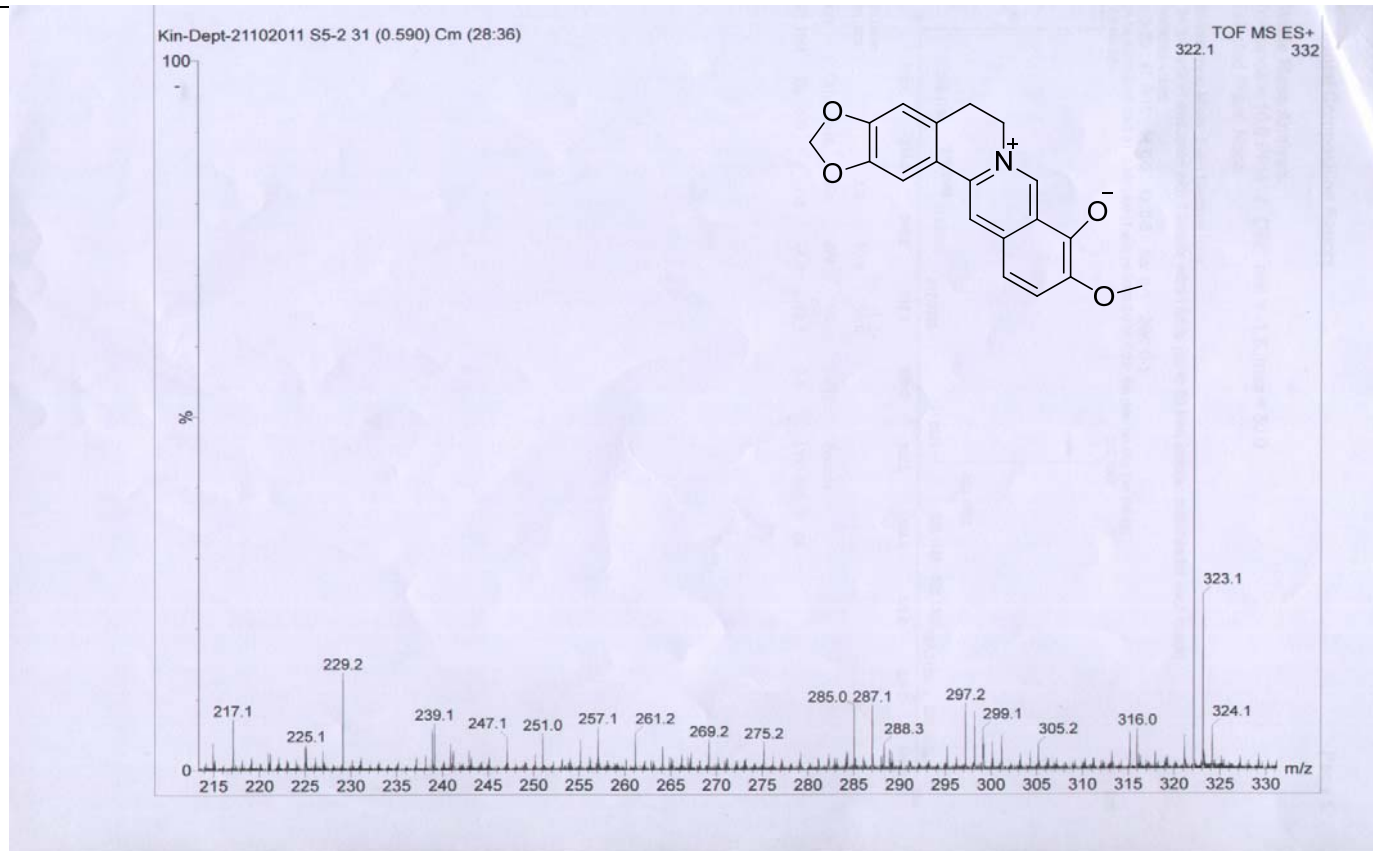

Mass spectrum of berberrubine

Kin-Dept-13062012 HS S13 43 (0.805) Cm (43:50)

TOF MS ES+  
2.25e4

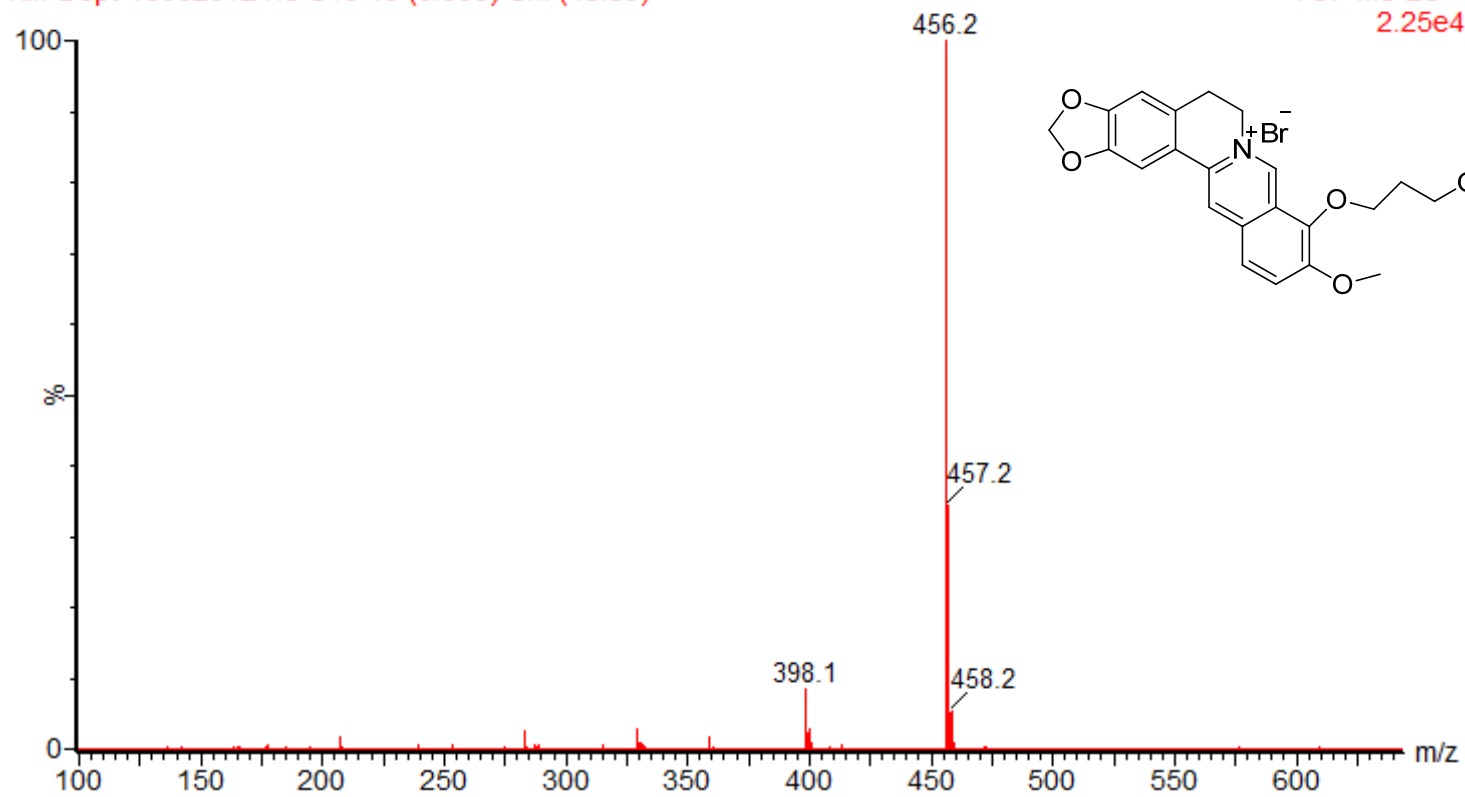

Mass spectrum of compound 1

Kin-Dept-13062012 HS S15 58 (1.084) Cm (58:65)

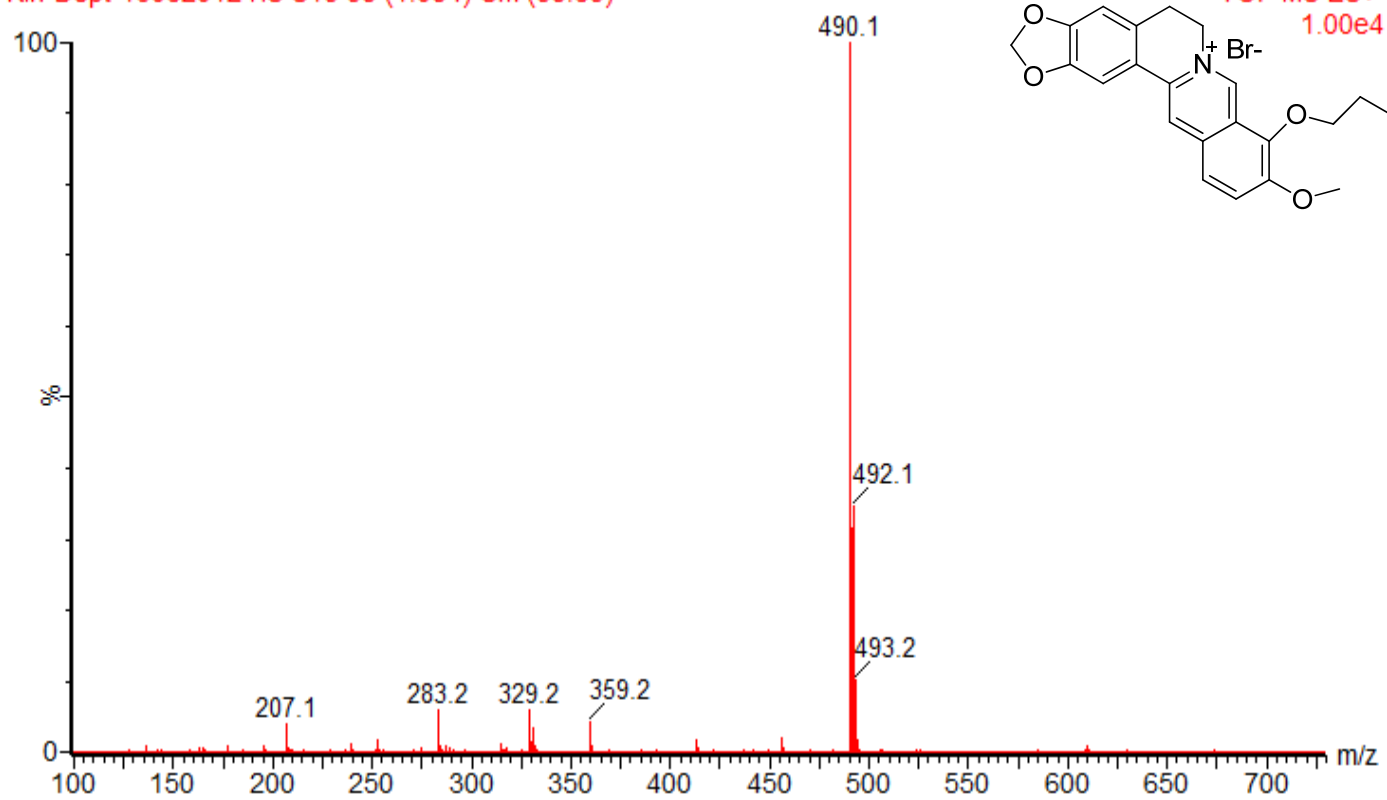

Mass spectrum of compound 2

Kin-Dept-13062012 HS S16 51 (0.954) Cm (51:56)

TOF MS ES+  
8.75e3

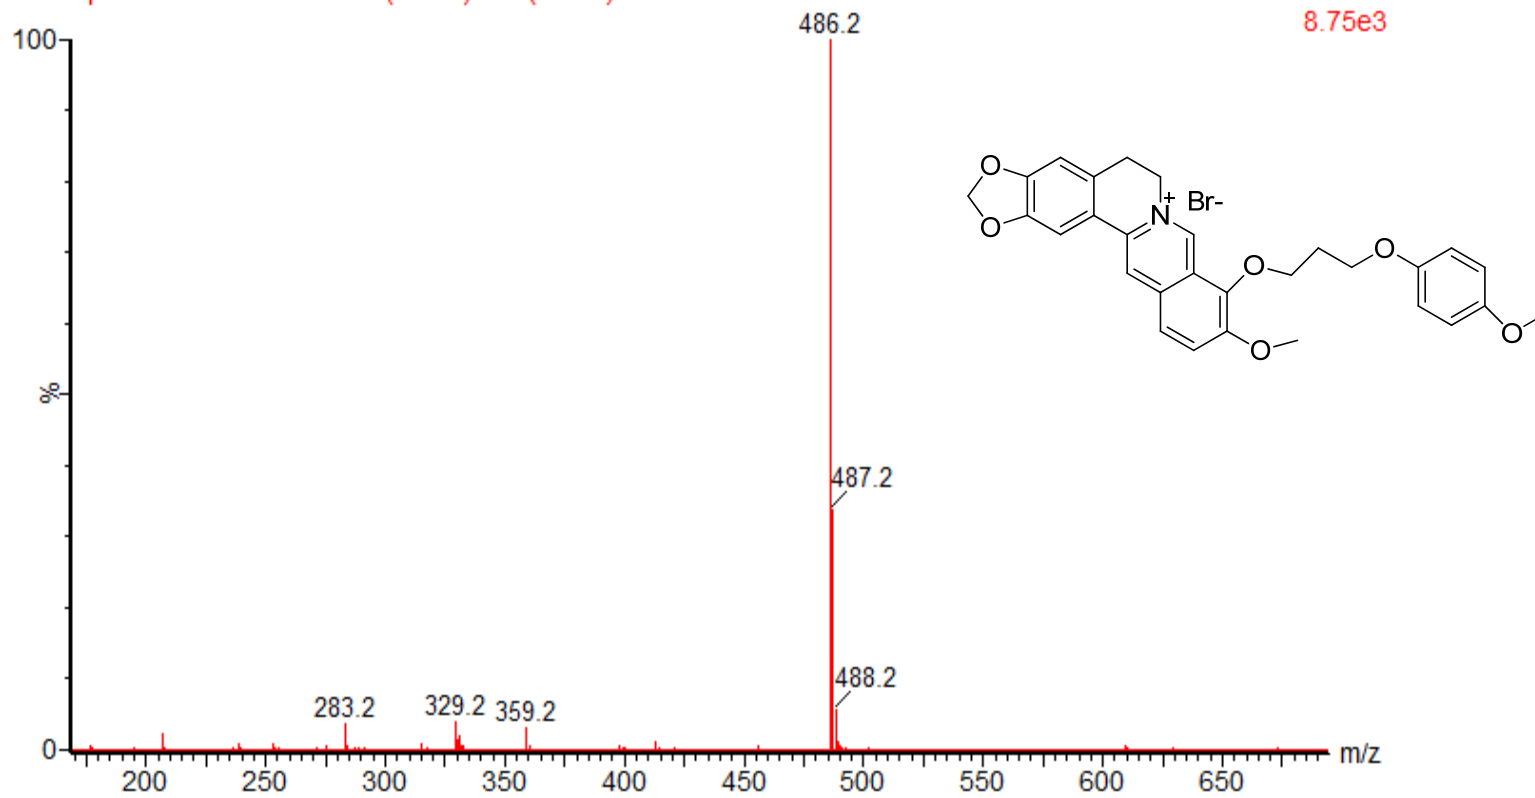

Mass spectrum of compound 3



Kin-Dept-13062012 HS S17 55 (1.028) Cm (55.63)

TOF MS ES+  
1.37e4

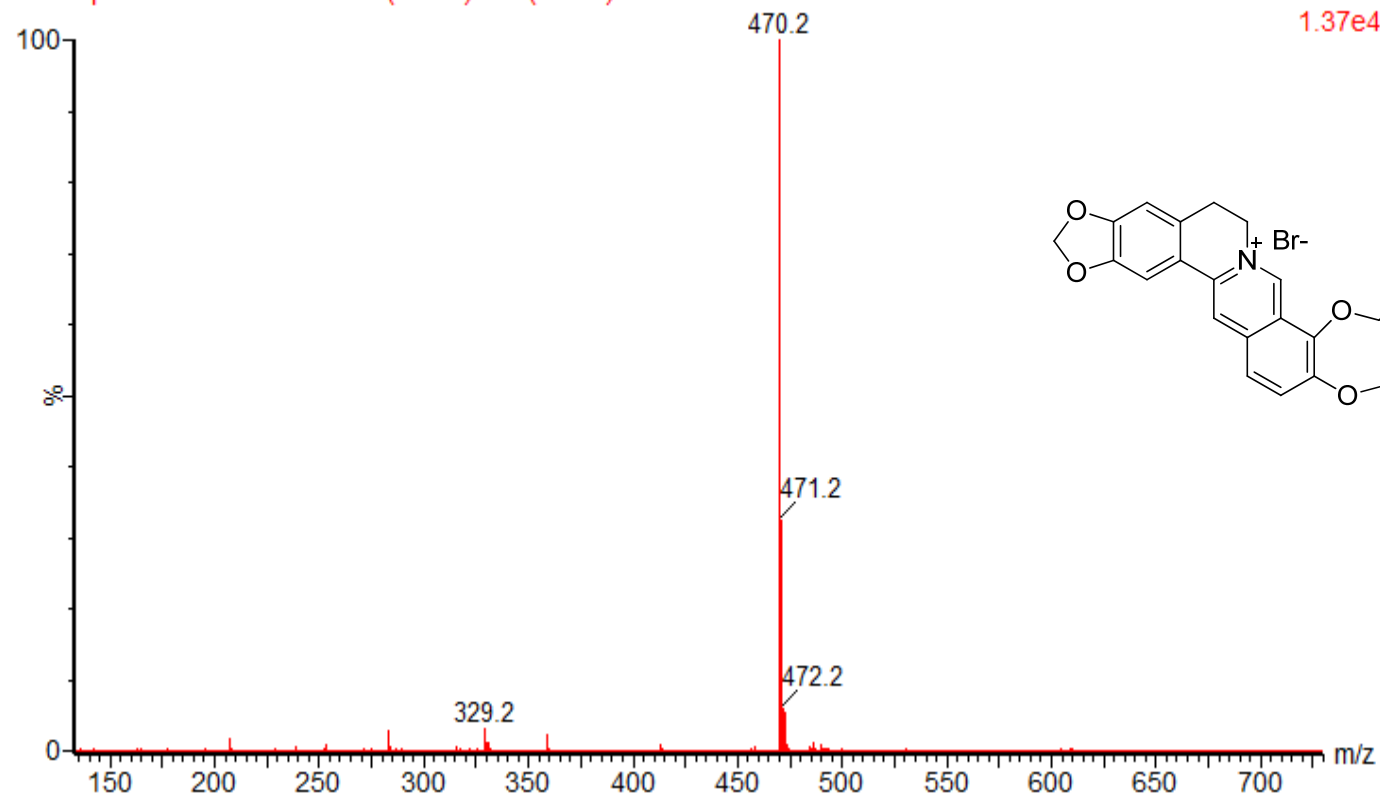

Mass spectrum of compound 4

Kin-Dept-13062012 HS S18 49 (0.917) Cm (49:61)

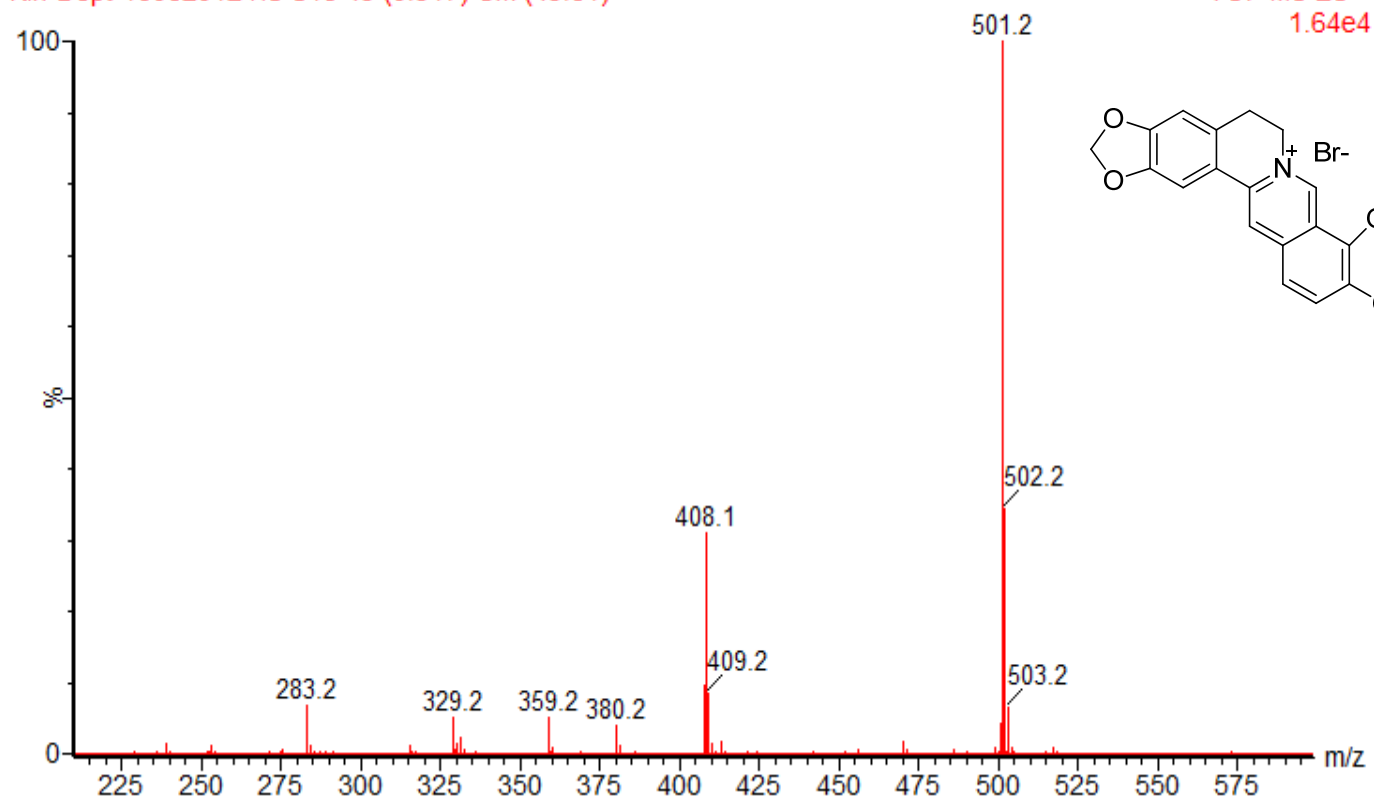

Mass spectrum of compound **5**

Kin-Dept-13062012 HS S14-2 41 (0.768) Cm (37:47)

TOF MS ES+  
1.35e4

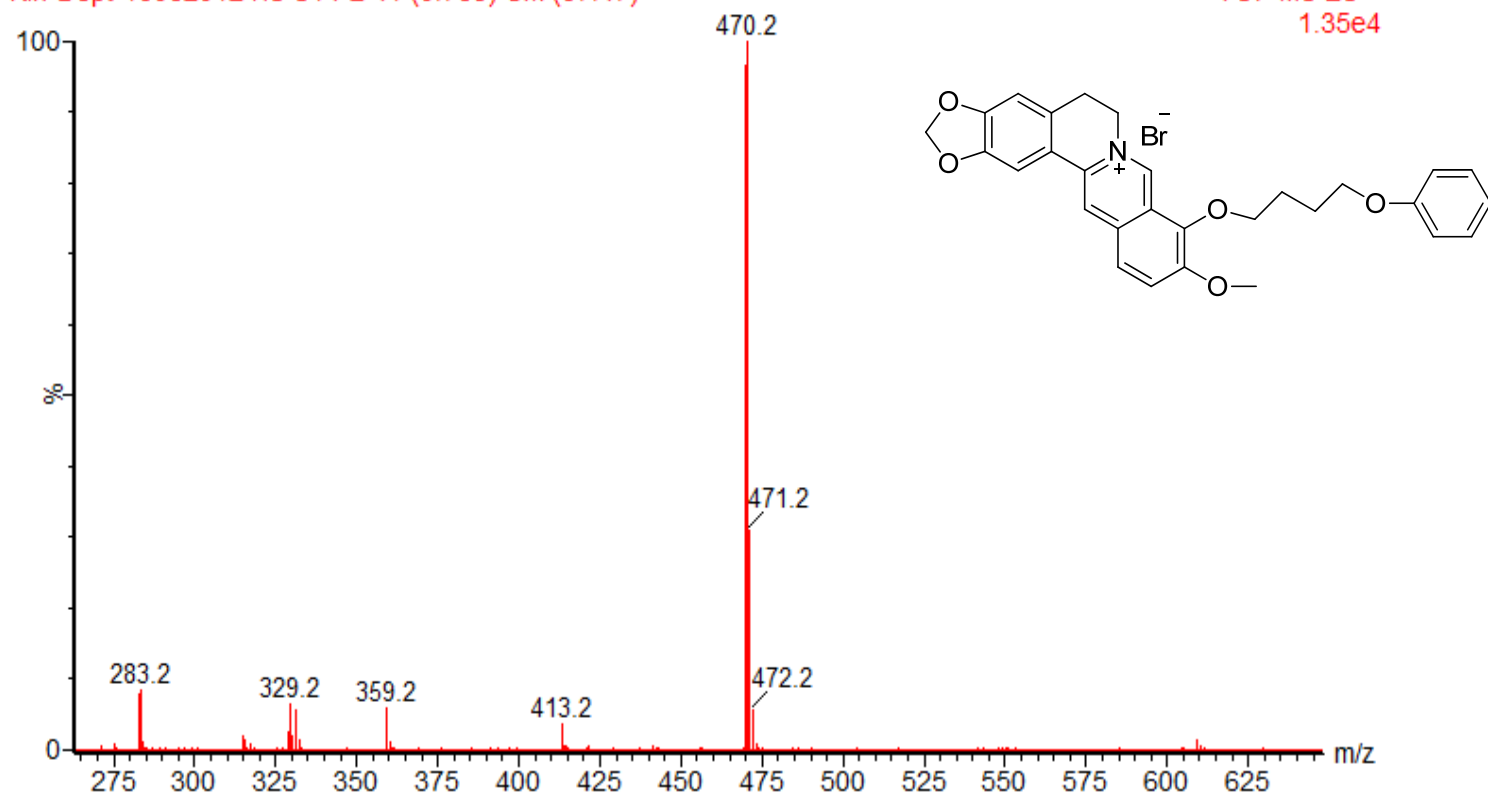

Mass spectrum of compound 6

Kin-Dept-13062012 HS S13 43 (0.805) Cm (43:50)

TOF MS ES+  
2.25e4



Mass spectrum of compound 7

# <sup>1</sup>H NMR spectra of compounds

20111208 berberubin

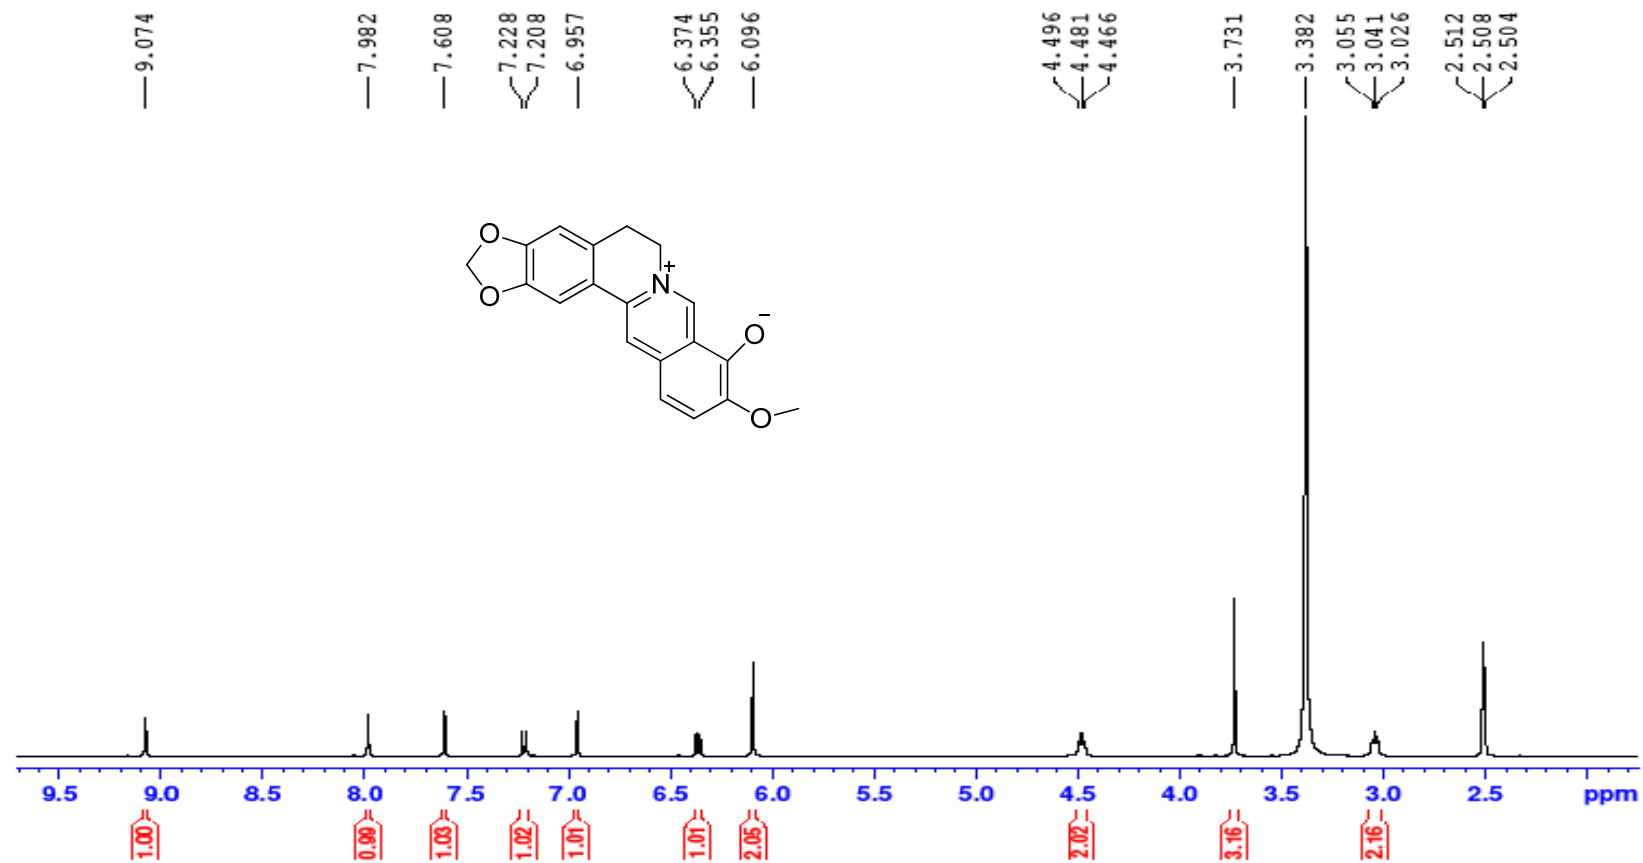

<sup>1</sup>H NMR spectrum of berberrubine

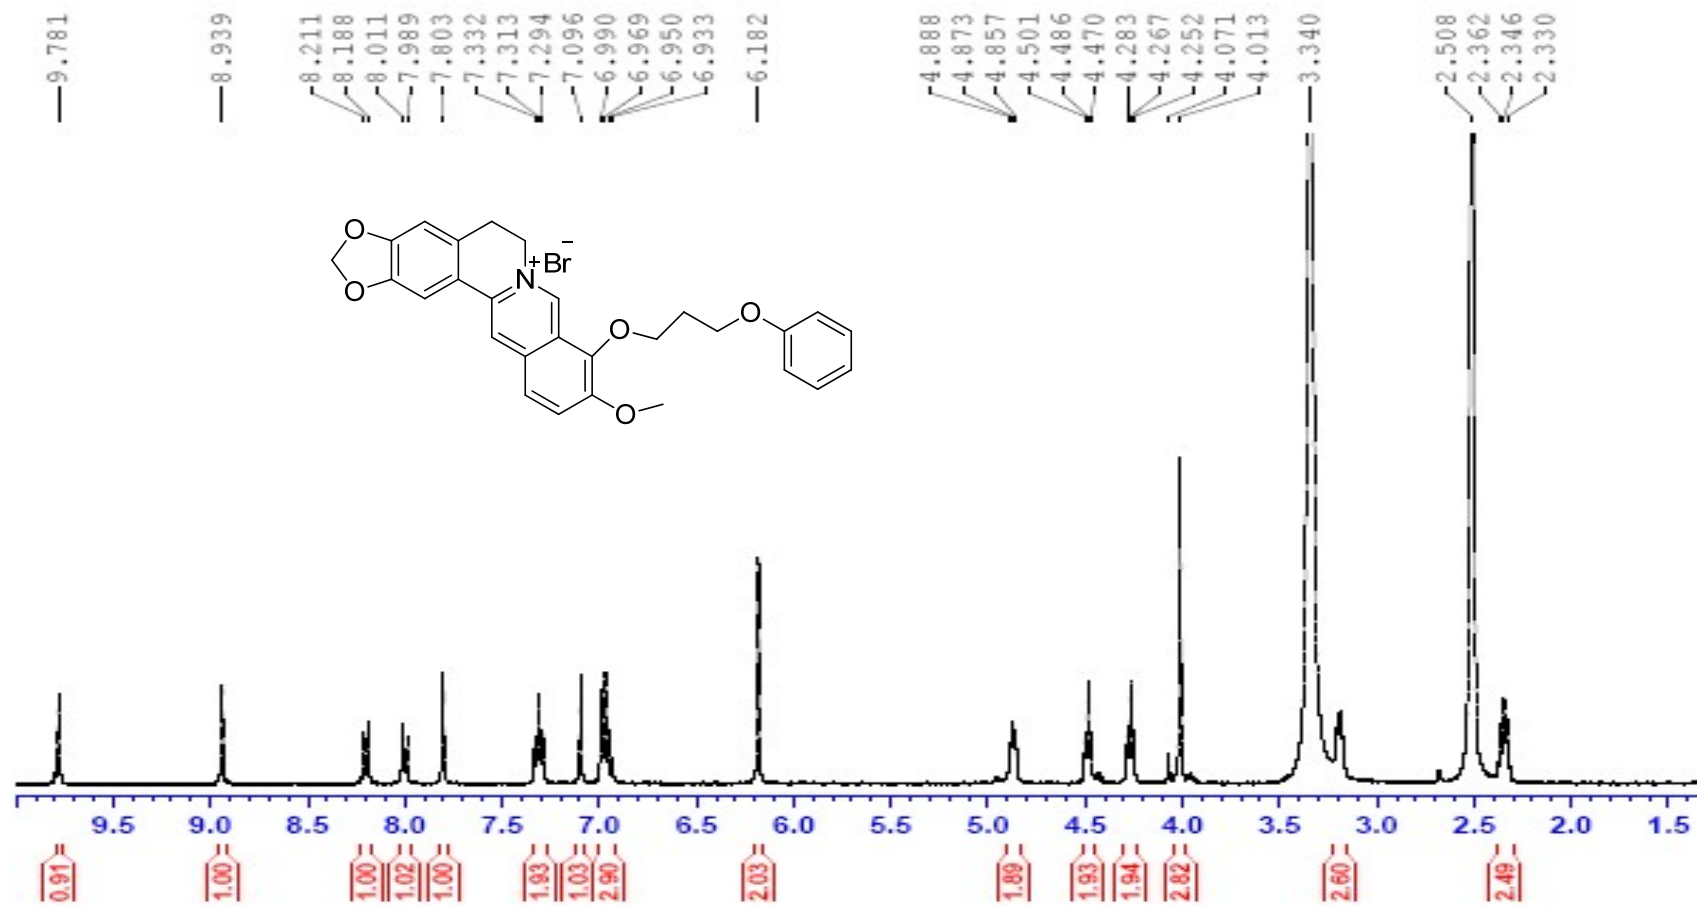

<sup>1</sup>H NMR spectrum of compound 1

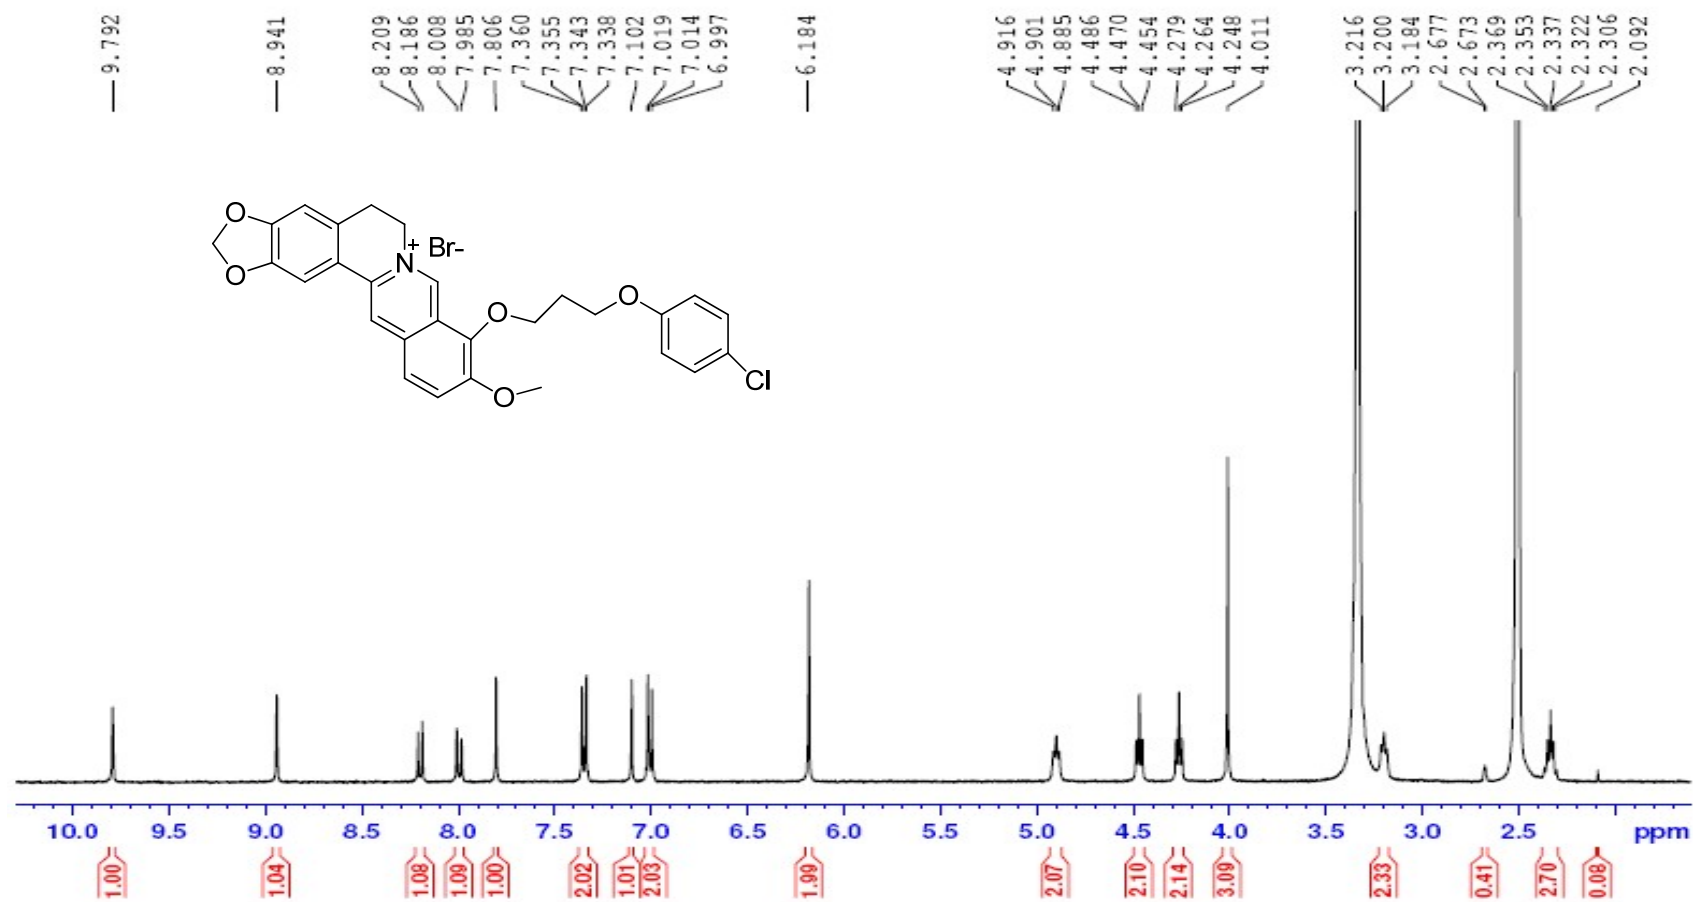

<sup>1</sup>H NMR spectrum of compound 2

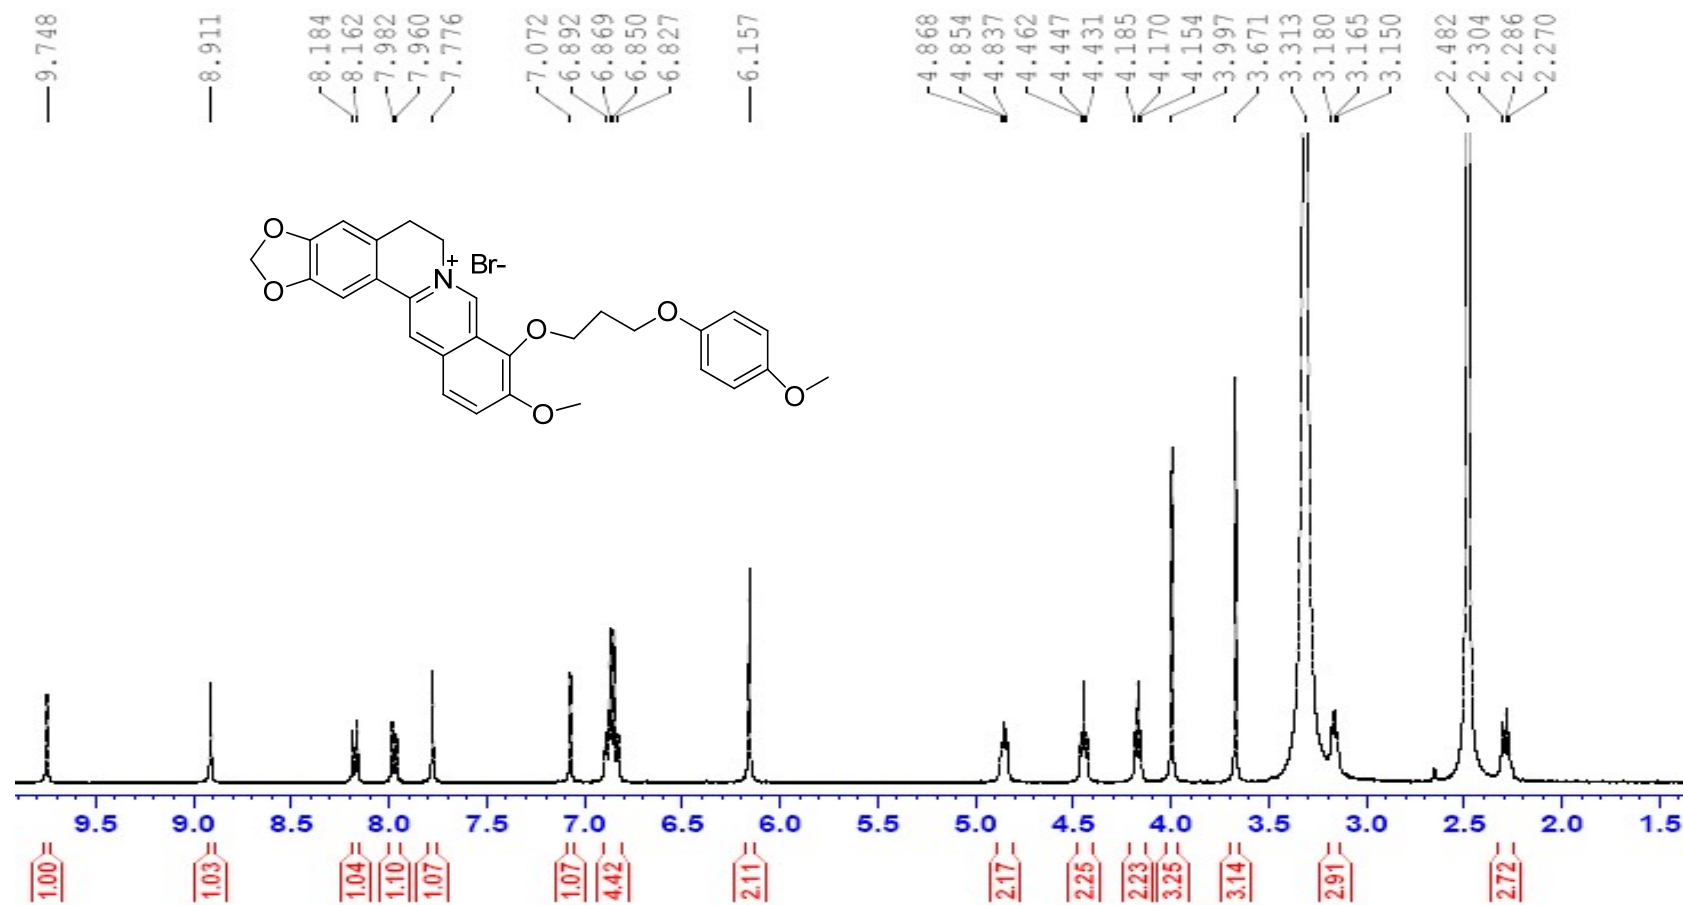

<sup>1</sup>H NMR spectrum of compound 3



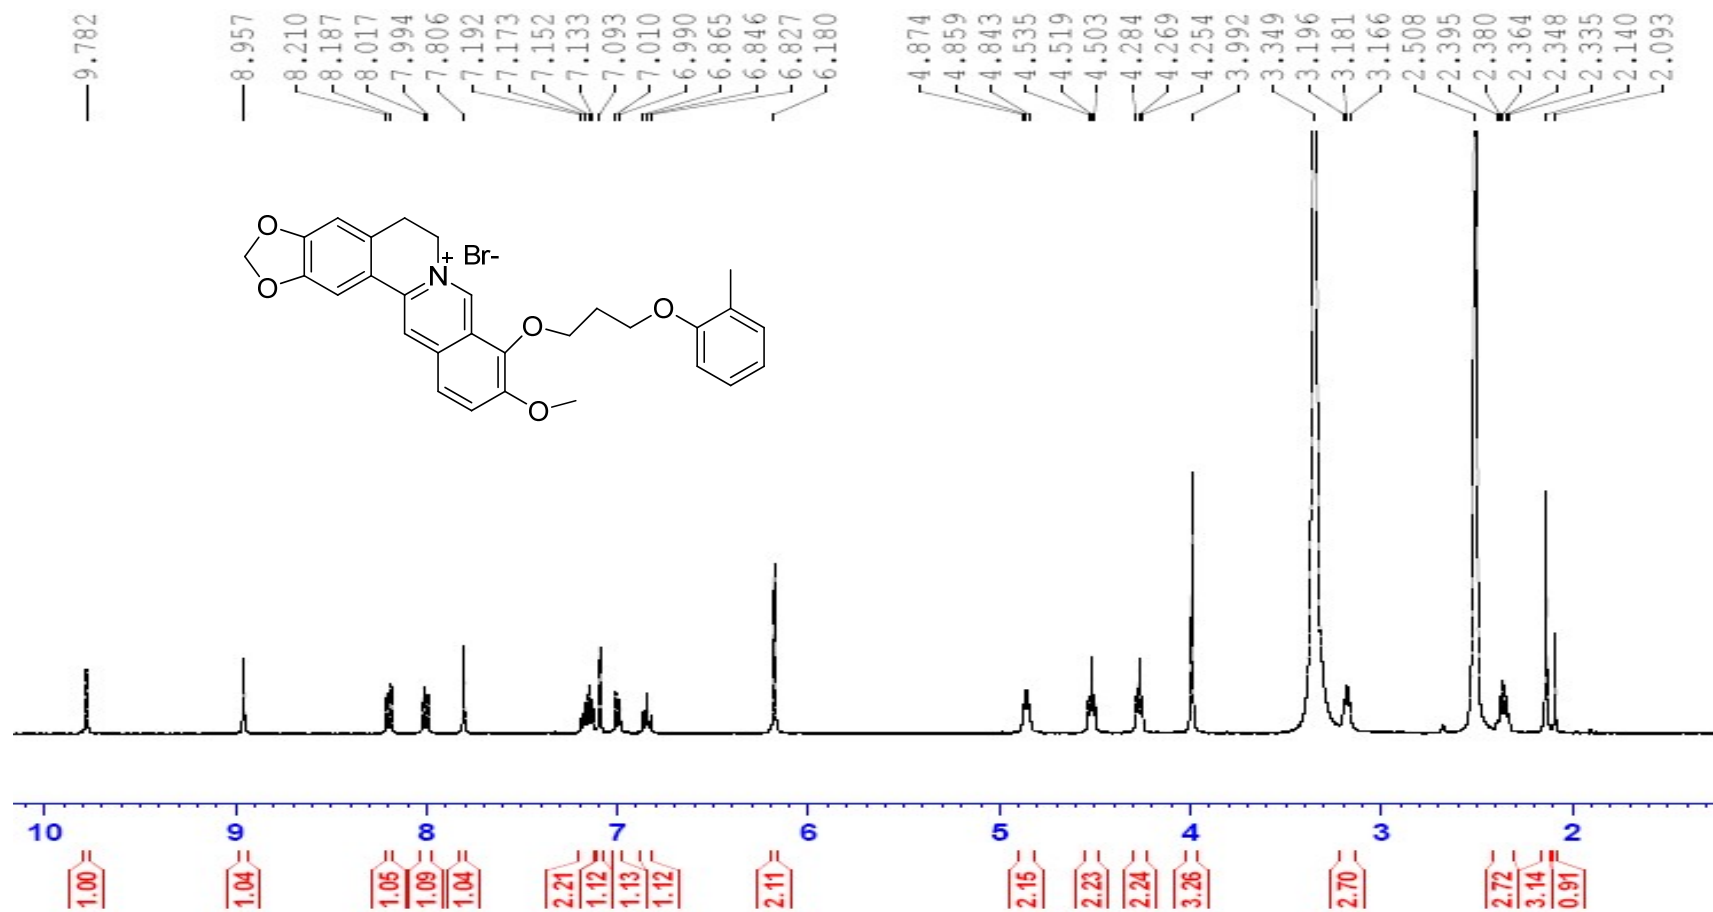

$^1\text{H}$  NMR spectrum of compound 4

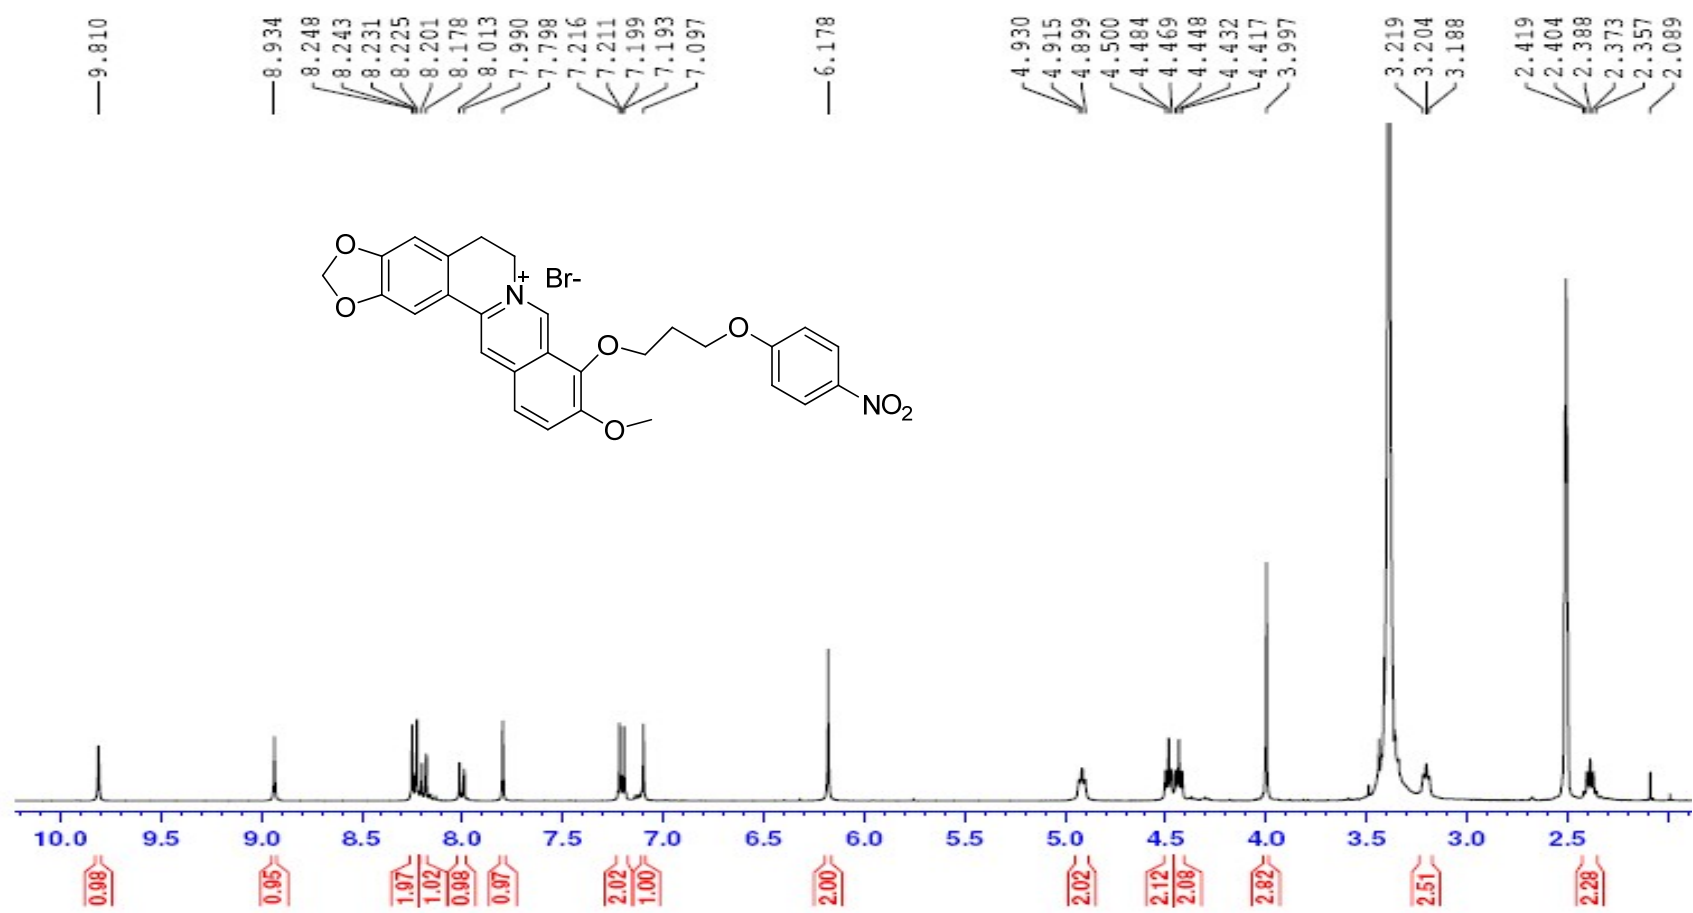

<sup>1</sup>H NMR spectrum of compound 5

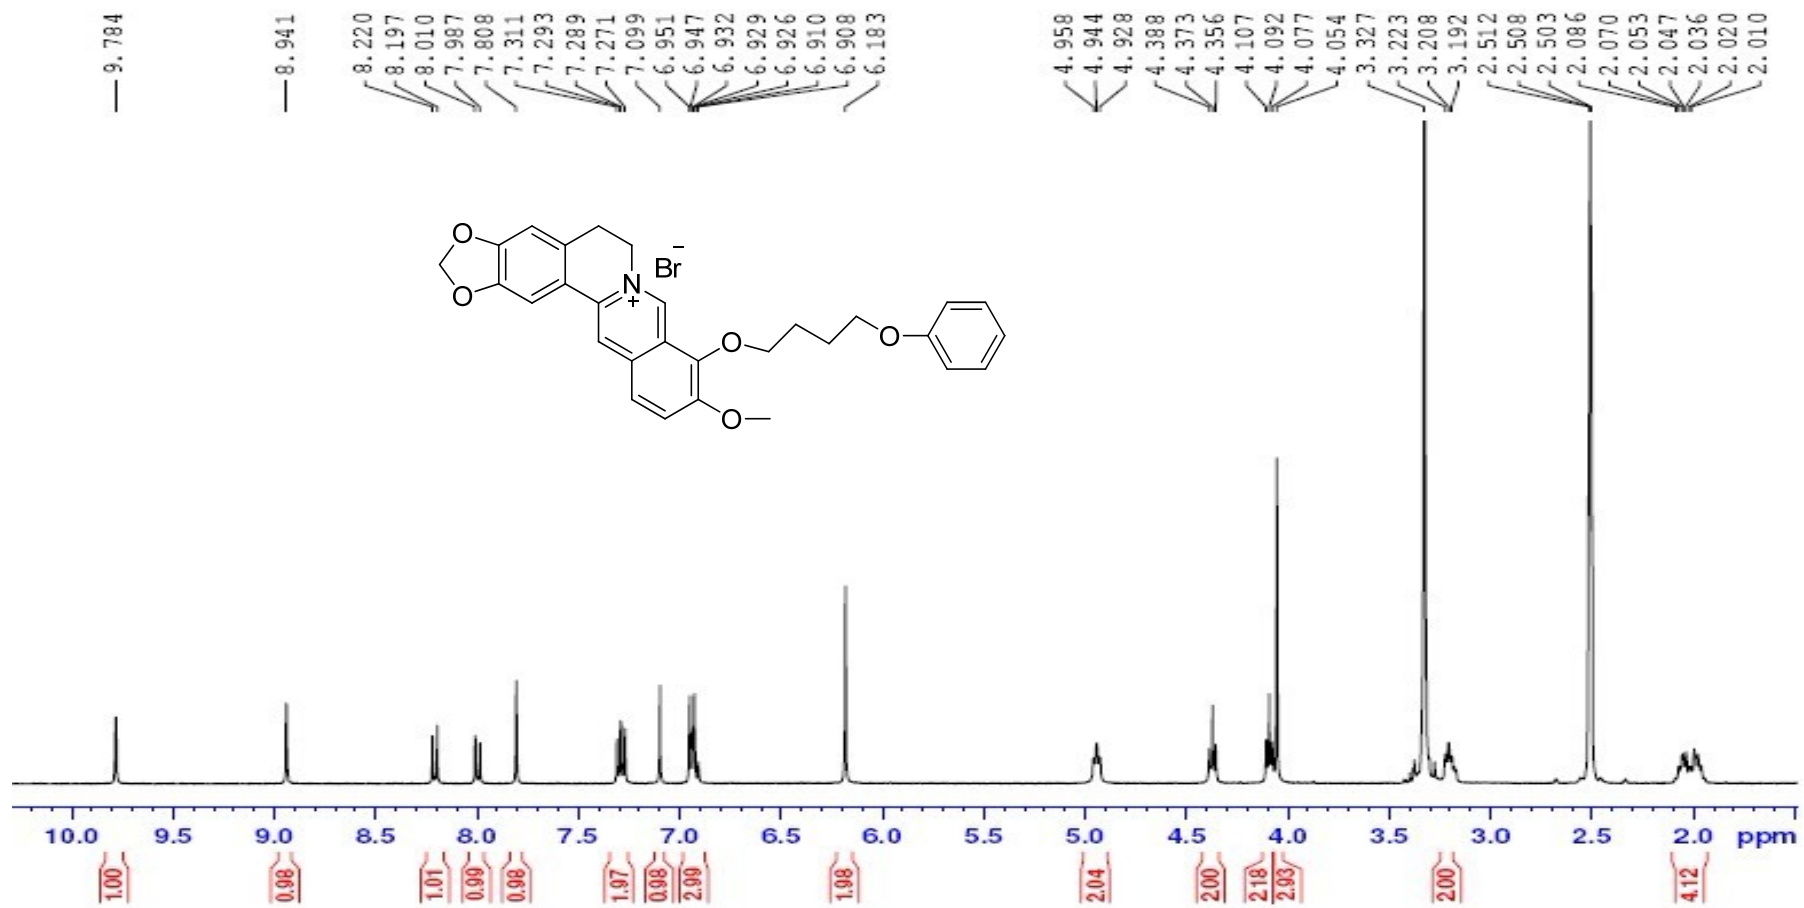

<sup>1</sup>H NMR spectrum of compound 6

20120620 xiaobojianbingxiuwan

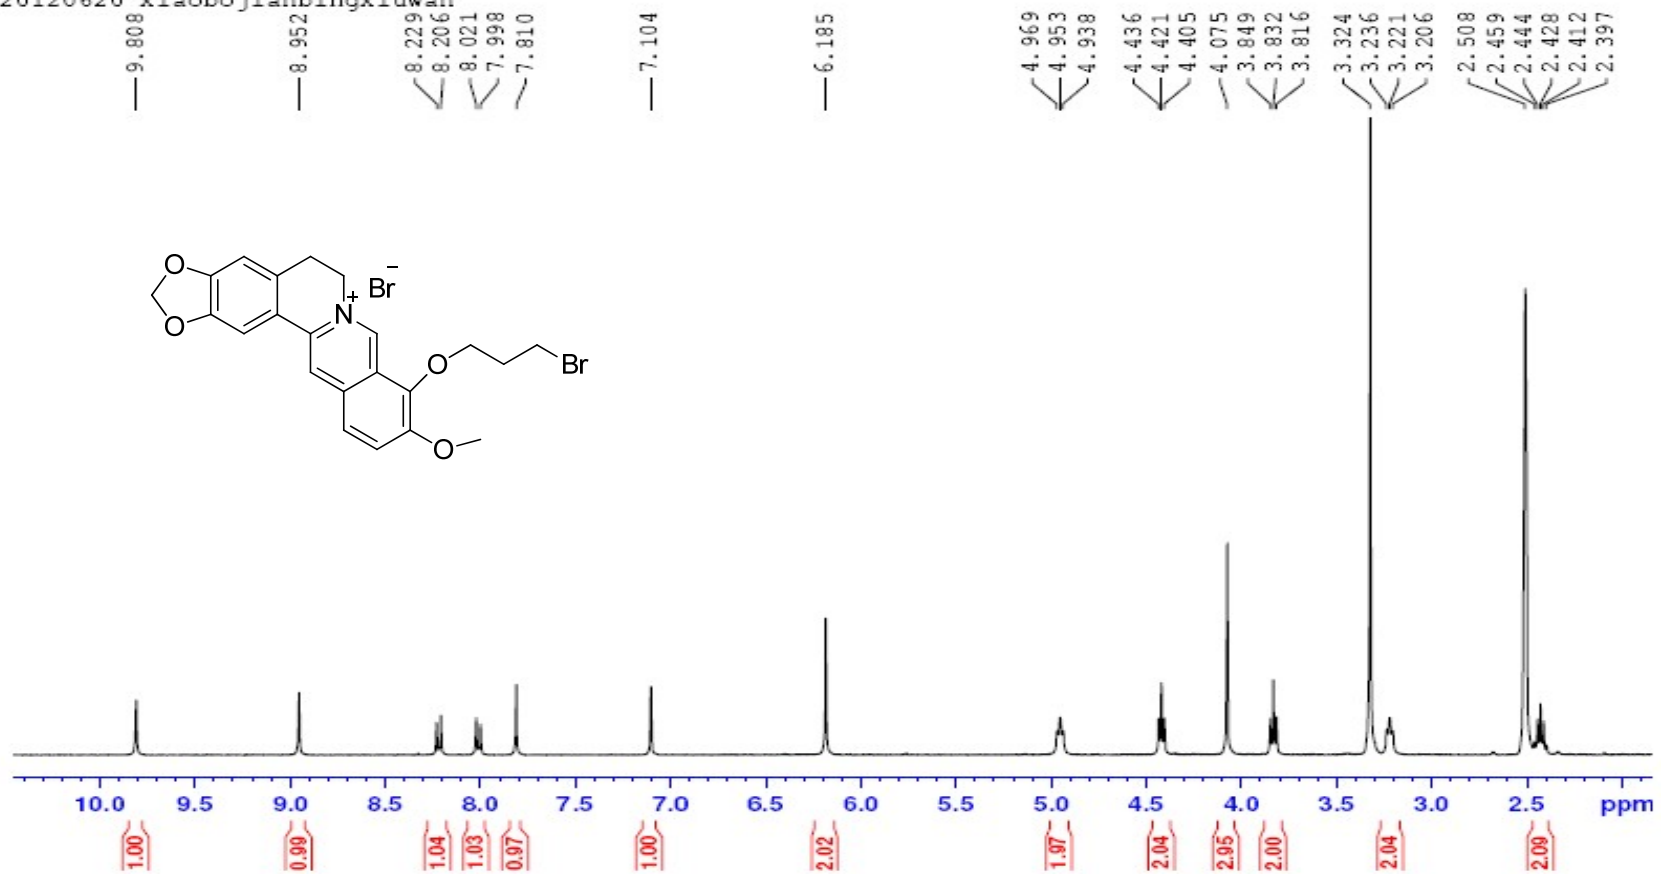

<sup>1</sup>H NMR spectrum of compound 7

## References

1. Huang L, Luo Z, He F, Lu J, Li X (2010) Synthesis and biological evaluation of a new series of berberine derivatives as dual inhibitors of acetylcholinesterase and butyrylcholinesterase. *Bioorganic & Medicinal Chemistry* 18: 4475-4484.
2. Zhang WJ, Ou TM, Lu YJ, Huang YY, Wu WB, et al. (2007) 9-Substituted berberine derivatives as G-quadruplex stabilizing ligands in telomeric DNA. *Bioorganic & Medicinal Chemistry* 15: 5493-5501.
